# Supplementary material
Source: PubMed Central journal article supplement (PMC3690807)

**Table S1.****Capsule size differences in variable capsule inducing conditions.**

| Medium                            | RC2 (SM) | RC2 $\Delta all1$ | RC2 $\Delta all1$ + ALL1 | H99      | H99 $\Delta all1$ | H99 $\Delta all1$ + ALL1 |
|-----------------------------------|----------|-------------------|--------------------------|----------|-------------------|--------------------------|
| SAB                               | 0.8±0.4  | 2.0±0.5           | 0.9±0.2                  | 1.2±0.2  | 1.3±0.2           | 1.2 0.3                  |
| <i>In vivo</i> (d7-PI)            | 8.0±1.8  | 5.9±1.7           | ND                       | 12.2±4.8 | 6.0±3.4           | ND                       |
| LIM                               | 6.0±1.1  | 5.0±1.1           | 5.8±1.3                  | 2.5±1.0  | 1.7±0.6           | 2.3±0.8                  |
| DMEM + FCS (10%), CO <sub>2</sub> | 3.7±0.9  | 2.5±1.1           | 3.0±1.1                  | 3.7±1.1  | 3.0±0.8           | 4.4±0.6                  |
| LIM + 5% CO <sub>2</sub>          | 7.2±2.0  | 6.3±2.0           | 7.4±1.8                  | 3.3±1.0  | 2.5±0.6           | 3.5±0.4                  |

**ND – Not done****Table S2. Capsule Size in mutants overexpressing ALL1**

|                                   | RC2 (SM)    | RC2- $\Delta all1$ | P <sub>CTR4-2</sub> -ALL1 |
|-----------------------------------|-------------|--------------------|---------------------------|
| Minimal media                     | 2.94 ± 0.49 | 2.82 ± 0.38        | 3.31 ± 0.61               |
| ASN + BCS                         | 1.48 ± 0.42 | ND                 | 5.47 ± 1.86               |
| LIM + BPS + BCS                   | 7.04 ± 1.14 | 5.13 ± 0.64        | 7.74 ± 1.65               |
| DMEM+10%FCS (5% CO <sub>2</sub> ) | 5.04 ± 0.81 | 4.37± 0.62         | 5.5 ± 1.05                |

ST1 and ST2: Capsule size is expressed in  $\mu\text{m} \pm$  standard deviation. LIM-low iron media, SAB-Sabroaud's Dextrose Broth, D7-post infection (PI)-Day 7, ASN-Asparagine Salt medium, BPS-Iron Chelator, BCS- Copper Chelator

**Table S3:** Gene ontology (GO) enrichment analysis on differentially expressed genes (at least 2-fold) with statistical significance (q value less than 0.05) in RC2- $\Delta all1$  mutant versus wild-type (RC2-SM).

| GO_ID      | GO_TERM                                              | P_Value_Hypergeometric | P_Value_Hypergeometric_with_Bonferroni_Correction |
|------------|------------------------------------------------------|------------------------|---------------------------------------------------|
| GO:0016491 | GO:oxidoreductase activity                           | 3.97E-05               | 0.0021041                                         |
| GO:0055114 | GO:oxidation-reduction process                       | 0.000286645            | 0.01519218                                        |
| GO:0055085 | GO:transmembrane transport                           | 0.000411722            | 0.02182127                                        |
| GO:0016021 | GO:integral to membrane                              | 0.001892841            | 0.10032057                                        |
| GO:0005507 | GO:copper ion binding                                | 0.00326928             | 0.17327184                                        |
| GO:0045735 | GO:nutrient reservoir activity                       | 0.00877193             | 0.46491229                                        |
| GO:0022857 | GO:transmembrane transporter activity                | 0.01421087             | 0.75317611                                        |
| GO:0000042 | GO:protein targeting to Golgi                        | 0.01746781             | 0.92579393                                        |
| GO:0006801 | GO:superoxide metabolic process                      | 0.01746781             | 0.92579393                                        |
| GO:0016301 | GO:kinase activity                                   | 0.02608829             | 1                                                 |
| GO:0031683 | GO:G-protein beta/gamma-subunit complex binding      | 0.02608829             | 1                                                 |
| GO:0046872 | GO:metal ion binding                                 | 0.02608829             | 1                                                 |
| GO:0070403 | GO:NAD+ binding                                      | 0.04310564             | 1                                                 |
| GO:0006031 | GO:chitin biosynthetic process                       | 0.04310564             | 1                                                 |
| GO:0007186 | GO:G-protein coupled receptor signaling pathway      | 0.04310564             | 1                                                 |
| GO:0004100 | GO:chitin synthase activity                          | 0.04310564             | 1                                                 |
| GO:0004871 | GO:signal transducer activity                        | 0.05150379             | 1                                                 |
| GO:0005840 | GO:ribosome                                          | 0.05200313             | 1                                                 |
| GO:0006412 | GO:translation                                       | 0.05604526             | 1                                                 |
| GO:0019001 | GO:guanyl nucleotide binding                         | 0.05982908             | 1                                                 |
| GO:0015693 | GO:magnesium ion transport                           | 0.05982908             | 1                                                 |
| GO:0015095 | GO:magnesium ion transmembrane transporter activity  | 0.05982908             | 1                                                 |
| GO:0003735 | GO:structural constituent of ribosome                | 0.06023334             | 1                                                 |
| GO:0008565 | GO:protein transporter activity                      | 0.07626363             | 1                                                 |
| GO:0004252 | GO:serine-type endopeptidase activity                | 0.1003845              | 1                                                 |
| GO:0003964 | GO:RNA-directed DNA polymerase activity              | 0.1003845              | 1                                                 |
| GO:0005509 | GO:calcium ion binding                               | 0.1003845              | 1                                                 |
| GO:0004672 | GO:protein kinase activity                           | 0.1003845              | 1                                                 |
| GO:0005543 | GO:phospholipid binding                              | 0.1082857              | 1                                                 |
| GO:0005643 | GO:nuclear pore                                      | 0.1082857              | 1                                                 |
| GO:0016020 | GO:membrane                                          | 0.1207823              | 1                                                 |
| GO:0016706 | GO:oxidoreductase activity, acting on paired donors, | 0.1392103              | 1                                                 |
| GO:0006351 | GO:transcription, DNA-dependent                      | 0.1741184              | 1                                                 |
| GO:0003677 | GO:DNA binding                                       | 0.1806229              | 1                                                 |

|            |                                                     |           |   |
|------------|-----------------------------------------------------|-----------|---|
| GO:0003924 | GO:GTPase activity                                  | 0.1979146 | 1 |
| GO:0050660 | GO:flavin adenine dinucleotide binding              | 0.2049686 | 1 |
| GO:0006278 | GO:RNA-dependent DNA replication                    | 0.2090652 | 1 |
| GO:0006468 | GO:protein phosphorylation                          | 0.2122815 | 1 |
| GO:0005634 | GO:nucleus                                          | 0.228065  | 1 |
| GO:0006457 | GO:protein folding                                  | 0.2325769 | 1 |
| GO:0043565 | GO:sequence-specific DNA binding                    | 0.2393296 | 1 |
| GO:0020037 | GO:heme binding                                     | 0.2657581 | 1 |
| GO:0003700 | GO:sequence-specific DNA binding transcription fact | 0.3037084 | 1 |
| GO:0006355 | GO:regulation of transcription, DNA-dependent       | 0.3388221 | 1 |
| GO:0006886 | GO:intracellular protein transport                  | 0.3397192 | 1 |
| GO:0008270 | GO:zinc ion binding                                 | 0.3786665 | 1 |
| GO:0005622 | GO:intracellular                                    | 0.4324039 | 1 |
| GO:0005515 | GO:protein binding                                  | 0.4582816 | 1 |
| GO:0003676 | GO:nucleic acid binding                             | 0.4591595 | 1 |
| GO:0003723 | GO:RNA binding                                      | 0.5028527 | 1 |
| GO:0016787 | GO:hydrolase activity                               | 0.5328346 | 1 |
| GO:0005524 | GO:ATP binding                                      | 0.6710678 | 1 |
| GO:0008152 | GO:metabolic process                                | 0.8374141 | 1 |

**Table S4: Primers used in the study**

| Primer                  | SEQUENCE (5'-3')                                  | Function/ restriction site                                           |
|-------------------------|---------------------------------------------------|----------------------------------------------------------------------|
| H99AII1-NF              | <u>CCATAGATTGGT</u> GTCTCAAGTGCTTGTCCA            | <i>ALL1</i> gene knock out cassette/ <i>van91I</i>                   |
| H99AII1-NR              | <u>CCATCATTTGGAT</u> GAATTGGAGCGGAAAGTG           | <i>ALL1</i> gene knock out cassette/ <i>van91I</i>                   |
| H99AII1-CF              | <u>CCATTTCTTGGGGT</u> ATTTGAAGGTTAAAGGAGA<br>CTTC | <i>ALL1</i> gene knock out cassette/ <i>van91I</i>                   |
| H99AII1-CR              | <u>CCATAAATTGGT</u> GGACTTTACAGATGACAACAC<br>AA   | <i>ALL1</i> gene knock out cassette/ <i>van91I</i>                   |
| H99AII1-RecF            | <u>TCTAGATGTCAAGT</u> GCTTGTCCA                   | <i>ALL1</i> gene reconstitution in H99 $\Delta$ <i>all1/XbaI</i>     |
| H99AII1-RecR            | <u>CTCGAGCTGGGT</u> TCTGTGCTAAG                   | <i>ALL1</i> gene reconstitution in H99 $\Delta$ <i>all1/XhoI</i>     |
| H99AII1-RTf             | AAGGCGAGGGT GAGCACT                               | Real time PCR <i>ALL1</i>                                            |
| H99AII1-RTr             | TTAGAGAGCCTGGGTCTTGC                              | Real time PCR <i>ALL1</i>                                            |
| P <sub>CTR4-2</sub> For | <u>CCATTTCTTGGG</u> ACCAATTGGATATTGCTGTTTC<br>TAC | <i>CTR4</i> promoter for Overexpression (OX) Construct/ <i>van91</i> |
| P <sub>CTR4-2</sub> Rev | <u>CATATGGATTGGT</u> GAAGTCGTTG                   | <i>CTR4</i> promoter for OX Construct/ <i>NdeI</i>                   |
| ALL1-For                | <u>CATATGTCCGGC</u> GTTACCCAAGGTGTC               | <i>ALL1</i> gene for OX Construct                                    |
| ALL1-Rev                | <u>CCATAAATTGGT</u> TAAAGAGCCTGGGTCTTGCTG         |                                                                      |
| CNC05700                | GCGTATCAAGCTTTCCGAAG<br>CCTTCTTCTTCATGGCTTGC      | Real time PCR                                                        |
| CNC05690                | ATTCCTCCAGGGGAGACACT<br>GGAGCTCTCAAGCCATCAAC      | Real time PCR                                                        |
| CNM02430                | GCCTTCCTCAAAATGGACAG<br>AGACATCTTTTCACGGGCGAGC    | Real time PCR                                                        |
| CNM02420                | GTGATCATCGTTCACGCAAC<br>GGAATGGGACATTGGTTGAC      | Real time PCR                                                        |
| CNB02540                | GGGCATGTGAGTCGAGAGAT<br>CTCTCGAAGAACCCCTTCT       | Real time PCR                                                        |
| CNG00120                | ACAGCGGAACCTAAGCAAGA<br>AAGCAACAATGAGCGAGGTT      | Real time PCR                                                        |
| CNC01660-<br>JEC21      | GGCAATCACTGACTTCGACA<br>CACCGGACAAAGGGTAAGAA      | Real time PCR                                                        |

---

|                |                                               |               |
|----------------|-----------------------------------------------|---------------|
| CNC01660-H99   | CCTATGAGCGGTGGTGAGAT<br>GATCTCGCGGATAGAGTTGG  | Real time PCR |
| CNK02840-JEC21 | ACCTTGGCTTCTGGTCTGTG<br>TTTCCTCAATGGGGAGATTG  | Real time PCR |
| CNK02840-H99   | CCATCGAGGAAAGGAAATCA<br>GTGGGCTTTGAAGATGTCGT  | Real time PCR |
| CNG00950       | CAGACGACCACGACTCTCAA<br>CGTGCGAAGAATAGTGTGGA  | Real time PCR |
| CNI01980       | GACACGTCGATGTGGATGAG<br>CCCCACTGACATTTCTGCTT  | Real time PCR |
| CNB00400       | TATCATGGCTGGTGTGGCTA<br>GAAGCAGCAACGACGATGTA  | Real time PCR |
| CNH01230       | GCTTAGTAGATCCCGCGACA<br>GTCAGGCAATCCGATGATTT  | Real time PCR |
| CNG00110       | TCTGGGTATTTCGACCGATTC<br>GGAGCTGGTGACAGTAAGAC | Real time PCR |
| CNH00490       | CAGACTGCCGCTGTTGATTA<br>GTGGGGTTTGGAAACATTCAC | Real time PCR |

---

**Figure S1: Effect of *ALL1* overexpression on capsule induction**

Under Capsule inducing conditions,  $\Delta all1$  mutant has impaired capsule induction. Cells  $P_{CTR4-2}$ -*ALL1* overexpressing *ALL1* under promoter-inducing conditions (200 $\mu$ M BCS) have enhanced capsular induction. LIM-Low Iron Medium+100 $\mu$ M BPS, IM (DMEM+10%FCS+1%NCTC in 5% CO<sub>2</sub>). All capsules were measured after 18h. Bar represent 10 $\mu$ m.

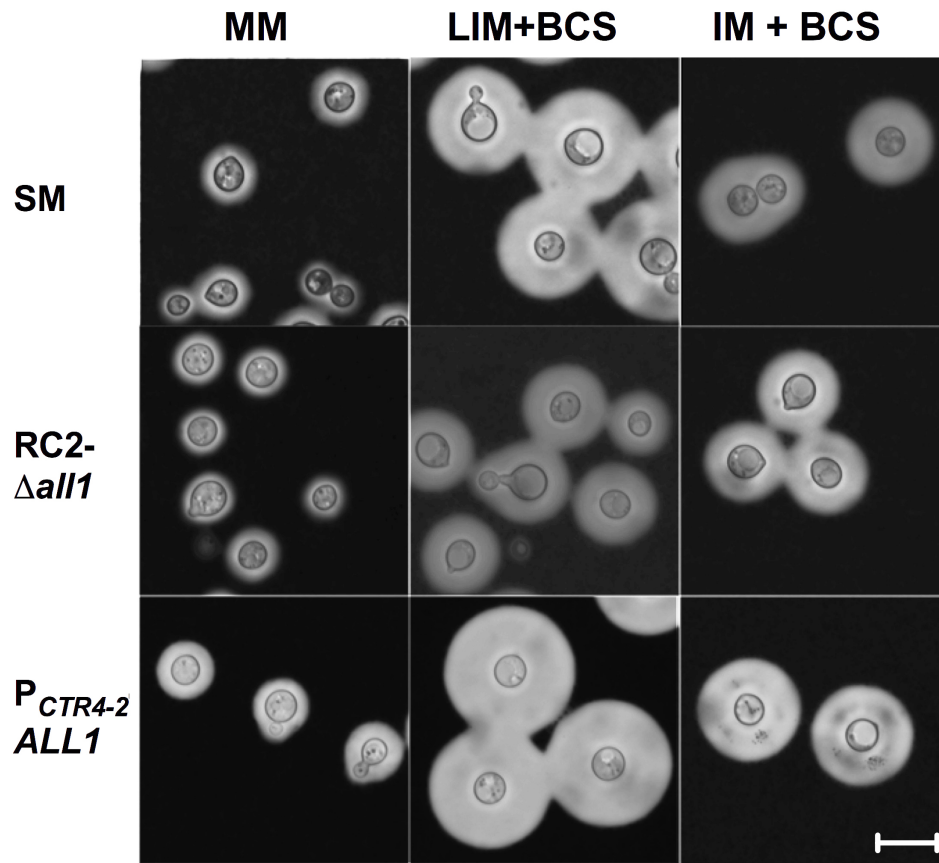

**Figure S2.** Antibody mediated phagocytosis of RC2-SM, RC2- $\Delta all1$ , H99 and H99- $\Delta all1$ . Reduction in percentage of phagocytosis was observed for  $\Delta all1$  mutants relative to the parental and reconstitution strains. Data are mean +/- SD of 3 independent experiments of triplicate wells

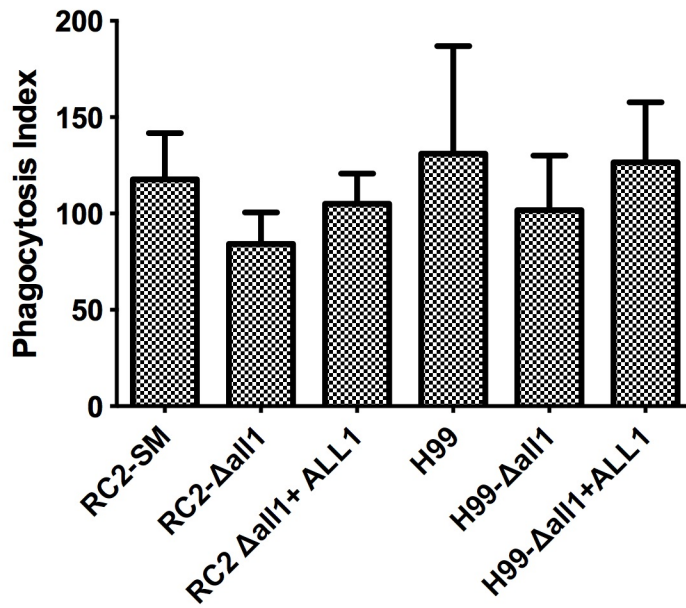

Supplement: NIHMS462541-supplement-Supp_Material.pdf [file NIHMS462541-supplement-Supp_Material.pdf]
